# Supplementary material
Source: publisher site journal article supplement (https://www.dovepress.com/article/541975)
Supplement: Supplementary file 1 [file 541975%20Supplementary%20Material.docx]

**Supplementary 1**

**COREQ (COnsolidated criteria for REporting Qualitative research) Checklist**

**A checklist of items that should be included in reports of qualitative research. You must report the page number in your manuscript where you consider each of the items listed in this checklist. If you have not included this information, either revise your manuscript accordingly before submitting or note N/A.**

| Items | Page |
| --- | --- |
| 1. Interviewer/facilitator   Which author/s conducted the interview or focus group? | 5 |
| 1. Credentials   What were the researcher’s credentials? E.g. PhD, MD | 5 |
| 1. Occupation   What was their occupation at the time of the study? | 5 |
| 1. Gender   Was the researcher male or female? | 5 |
| 1. Experience and training   What experience or training did the researcher have? | 5 |
| 1. Relationship established   Was a relationship established prior to study commencement? | 5 |
| 1. Participant knowledge of the interviewer   What did the participants know about the researcher? E.g. personal goals, reasons for doing the research | 5 |
| 1. Interviewer characteristics   What characteristics were reported about the interviewer/facilitator? E.g. Bias, assumptions, reasons and interests in the research topic | 5 |
| 1. Methodological orientation and Theory   What methodological orientation was stated to underpin the study? E.g. grounded theory, discourse analysis, ethnography, phenomenology, content analysis | 4 |
| 1. Sampling   How were participants selected? E.g. purposive, convenience, consecutive, snowball | 4 |
| 1. Method of approach   How were participants approached? E.g. face-to-face, telephone, mail, email | 4 |
| 1. Sample size   How many participants were in the study? | 4 |
| 1. Non-participation   How many people refused to participate or dropped out? Reasons? | 4 |
| 1. Setting of data collection   Where was the data collected? E.g. home, clinic, workplace | 4 |
| 1. Presence of non-participants   Was anyone else present besides the participants and researchers? | 5 |
| 1. Description of sample   What are the important characteristics of the sample? E.g. demographic data, date | 4-6 |
| 1. Interview guide   Were questions, prompts, guides provided by the authors?  Was it pilot tested? | 4 |
| 1. Repeat interviews   Were repeat interviews carried out? If yes, how many? | N/A |
| 1. Audio/visual recording   Did the research use audio or visual recording to collect the data? | 4 |
| 1. Field notes   Were field notes made during and/or after the interview or focus group? | N/A |
| 1. Duration   What was the duration of the interviews or focus group? | 4 |
| 1. Data saturation   Was data saturation discussed? | 4-5 |
| 1. Transcripts returned   Were transcripts returned to participants for comment and/or correction? | 4-5 |
| 1. Number of data coders   How many data coders coded the data? | 5-6 |
| 1. Description of the coding tree   Did authors provide a description of the coding tree? | 6-7 |
| 1. Derivation of themes   Were themes identified in advance or derived from the data? | 6-7 |
| 1. Software   What software, if applicable, was used to manage the data? | 4-5 |
| 1. Participant checking   Did participants provide feedback on the findings? | 4-5 |
| 1. Quotations presented   Were participant quotations presented to illustrate the themes/findings?  Was each quotation identified? E.g. participant number | 6-9 |
| 1. Data and findings consistent   Was there consistency between the data presented and the findings? | 6-9 |
| 1. Clarity of major themes   Were major themes clearly presented in the findings? | 6-9 |
| 1. Clarity of minor themes   Is there a description of diverse cases or discussion of minor themes? | 6-9 |
